# Supplementary material for: Effects of Gabapentin on Dorsal Anterior Cingulate Cortex GABA and Glutamate Levels and Their Associations With Abstinence in Alcohol Use Disorder: A Randomized Clinical Trial
Source: Atypon-hosted journal article supplement (doi:10.1176/appi.ajp.2021.20121757), 2021-07-14

**TABLE S1. <sup>1</sup>H-MRS Quality Control Metrics by Treatment Group (Placebo vs. Gabapentin)**

|                            | Placebo  |        |         | Gabapentin |        |         | Total    |        |         |
|----------------------------|----------|--------|---------|------------|--------|---------|----------|--------|---------|
|                            | <i>n</i> | Mean   | (SD)    | <i>n</i>   | Mean   | (SD)    | <i>n</i> | Mean   | (SD)    |
| <b>Glutamate Fit Error</b> |          |        |         |            |        |         |          |        |         |
| Scan 1                     | 30       | 5.63   | (0.49)  | 34         | 5.74   | (0.57)  | 64       | 5.69   | (0.53)  |
| Scan 2                     | 30       | 5.60   | (0.56)  | 34         | 5.59   | (0.50)  | 64       | 5.59   | (0.53)  |
| <b>GABA Fit Error</b>      |          |        |         |            |        |         |          |        |         |
| Scan 1                     | 31       | 5.85   | (1.43)  | 37         | 6.71   | (2.12)  | 68       | 6.32   | (1.87)  |
| Scan 2                     | 31       | 5.67   | (0.90)  | 37         | 6.17   | (1.60)  | 68       | 5.94   | (1.34)  |
| <b>FWHM</b>                |          |        |         |            |        |         |          |        |         |
| Scan 1                     | 31       | 8.74   | (0.67)  | 37         | 9.03   | (1.91)  | 68       | 8.90   | (1.48)  |
| Scan 2                     | 31       | 9.08   | (0.89)  | 37         | 8.89   | (0.58)  | 68       | 8.98   | (0.74)  |
| <b>Grey Matter</b>         |          |        |         |            |        |         |          |        |         |
| Scan 1                     | 31       | 0.51   | (0.03)  | 37         | 0.50   | (0.03)  | 68       | 0.50   | (0.03)  |
| Scan 2                     | 31       | 0.51   | (0.03)  | 37         | 0.50   | (0.03)  | 68       | 0.51   | (0.03)  |
| <b>White Matter</b>        |          |        |         |            |        |         |          |        |         |
| Scan 1                     | 31       | 0.26   | (0.04)  | 37         | 0.27   | (0.05)  | 68       | 0.26   | (0.04)  |
| Scan 2                     | 31       | 0.26   | (0.04)  | 37         | 0.27   | (0.05)  | 68       | 0.27   | (0.04)  |
| <b>CSF</b>                 |          |        |         |            |        |         |          |        |         |
| Scan 1                     | 31       | 0.23   | (0.05)  | 37         | 0.23   | (0.06)  | 68       | 0.23   | (0.05)  |
| Scan 2                     | 31       | 0.23   | (0.04)  | 37         | 0.22   | (0.06)  | 68       | 0.23   | (0.05)  |
| <b>Water</b>               |          |        |         |            |        |         |          |        |         |
| Scan 1                     | 31       | 0.12   | (0.03)  | 37         | 0.11   | (0.03)  | 68       | 0.12   | (0.03)  |
| Scan 2                     | 31       | 0.12   | (0.02)  | 37         | 0.12   | (0.03)  | 68       | 0.12   | (0.02)  |
| <b>NAA SNR</b>             |          |        |         |            |        |         |          |        |         |
| Scan 1                     | 31       | 356.43 | (66.53) | 37         | 322.07 | (97.45) | 68       | 337.73 | (85.92) |
| Scan 2                     | 31       | 355.81 | (68.34) | 37         | 337.00 | (85.31) | 68       | 345.58 | (78.05) |

*Note:* Fit Error = standard deviation of the residual of the metabolite peak fit expressed as a percentage of the metabolite peak height; FWHM = Full Width Half Maximum of the unsuppressed water peak; Grey matter, white matter, and cerebrospinal fluid (CSF) = proportion of each quantity within the acquisition voxel; Water = integral of the unsuppressed water peak; NAA SNR = signal to noise ratio of the n-acetyl-aspartate peak. In addition to GABA Fit Error, FWHM and Water (unsuppressed water spectrum), as well as NAA SNR (“edit = OFF” condition spectrum), were each calculated from MEGA-PRESS data.

**TABLE S2. <sup>1</sup>H-MRS Metabolite Levels by Treatment Group (Placebo vs. Gabapentin)**

|                   | Placebo  |       |        | Gabapentin |       |        | Total    |       |        |
|-------------------|----------|-------|--------|------------|-------|--------|----------|-------|--------|
|                   | <i>n</i> | Mean  | (SD)   | <i>n</i>   | Mean  | (SD)   | <i>n</i> | Mean  | (SD)   |
| <b>PRESS</b>      |          |       |        |            |       |        |          |       |        |
| <b>Glutamate</b>  |          |       |        |            |       |        |          |       |        |
| Scan 1            | 30       | 11.03 | (0.61) | 34         | 11.07 | (0.59) | 64       | 11.05 | (0.60) |
| Scan 2            | 30       | 11.16 | (0.74) | 34         | 11.16 | (0.78) | 64       | 11.16 | (0.75) |
| Change            | 30       | 0.13  | (0.83) | 34         | 0.09  | (0.78) | 64       | 0.11  | (0.80) |
| <b>Glx</b>        |          |       |        |            |       |        |          |       |        |
| Scan 1            | 30       | 13.54 | (0.93) | 34         | 13.64 | (0.84) | 64       | 13.59 | (0.88) |
| Scan 2            | 30       | 13.88 | (1.11) | 34         | 13.97 | (1.41) | 64       | 13.93 | (1.27) |
| Change            | 30       | 0.35  | (1.29) | 34         | 0.32  | (1.43) | 64       | 0.33  | (1.36) |
| <b>ml</b>         |          |       |        |            |       |        |          |       |        |
| Scan 1            | 30       | 7.64  | (0.86) | 34         | 7.69  | (0.95) | 64       | 7.66  | (0.90) |
| Scan 2            | 30       | 7.71  | (1.09) | 34         | 7.89  | (1.15) | 64       | 7.81  | (1.12) |
| Change            | 30       | 0.07  | (0.53) | 34         | 0.21  | (0.52) | 64       | 0.14  | (0.52) |
| <b>tCho</b>       |          |       |        |            |       |        |          |       |        |
| Scan 1            | 30       | 2.31  | (0.28) | 34         | 2.25  | (0.23) | 64       | 2.28  | (0.25) |
| Scan 2            | 30       | 2.37  | (0.26) | 34         | 2.34  | (0.27) | 64       | 2.35  | (0.26) |
| Change            | 30       | 0.06  | (0.22) | 34         | 0.08  | (0.13) | 64       | 0.07  | (0.18) |
| <b>tNAA</b>       |          |       |        |            |       |        |          |       |        |
| Scan 1            | 30       | 10.62 | (0.73) | 34         | 10.70 | (0.73) | 64       | 10.66 | (0.73) |
| Scan 2            | 30       | 10.46 | (0.83) | 34         | 10.61 | (0.96) | 64       | 10.54 | (0.90) |
| Change            | 30       | -0.15 | (0.76) | 34         | -0.09 | (0.76) | 64       | -0.12 | (0.75) |
| <b>tCr</b>        |          |       |        |            |       |        |          |       |        |
| Scan 1            | 30       | 7.87  | (0.50) | 34         | 7.77  | (0.50) | 64       | 7.82  | (0.50) |
| Scan 2            | 30       | 7.84  | (0.47) | 34         | 7.79  | (0.50) | 64       | 7.81  | (0.48) |
| Change            | 30       | -0.03 | (0.39) | 34         | 0.02  | (0.35) | 64       | 0.00  | (0.37) |
| <b>MEGA-PRESS</b> |          |       |        |            |       |        |          |       |        |
| <b>GABA</b>       |          |       |        |            |       |        |          |       |        |
| Scan 1            | 31       | 1.02  | (0.25) | 36         | 0.99  | (0.25) | 67       | 1.01  | (0.25) |
| Scan 2            | 31       | 1.05  | (0.21) | 36         | 1.02  | (0.21) | 67       | 1.04  | (0.21) |
| Change            | 31       | 0.03  | (0.26) | 36         | 0.03  | (0.28) | 67       | 0.03  | (0.27) |
| <b>Glx</b>        |          |       |        |            |       |        |          |       |        |
| Scan 1            | 31       | 6.69  | (1.22) | 36         | 6.84  | (1.02) | 67       | 6.77  | (1.11) |
| Scan 2            | 31       | 6.67  | (1.16) | 36         | 6.79  | (1.17) | 67       | 6.73  | (1.16) |
| Change            | 31       | -0.02 | (0.96) | 36         | -0.05 | (1.09) | 67       | -0.04 | (1.02) |

*Note:* All metabolites were normalized to water, corrected for within-voxel cerebrospinal fluid fraction, and expressed in Institutional Units. Change was calculated as the value at Scan 1 (baseline) subtracted from the value at Scan 2. Glx = Glutamate + Glutamine, ml = Myo-inositol, tCho = Choline-containing Compounds, tNAA = N-Acetyl-containing Compounds, GABA =  $\gamma$ -Aminobutyric Acid.

**TABLE S3. Percent Days Abstinent (PDA) Across Study by Treatment Group (Placebo vs. Gabapentin)**

| Week          | Placebo  |       |         | Gabapentin |       |         | Total    |       |         |
|---------------|----------|-------|---------|------------|-------|---------|----------|-------|---------|
|               | <i>n</i> | Mean  | (SD)    | <i>n</i>   | Mean  | (SD)    | <i>n</i> | Mean  | (SD)    |
| Between Scans | 31       | 77.1% | (30.3%) | 37         | 75.5% | (34.2%) | 68       | 76.2% | (32.2%) |
| 4             | 30       | 69.5% | (32.3%) | 37         | 62.6% | (41.2%) | 67       | 65.7% | (37.3%) |
| 6             | 29       | 59.7% | (37.6%) | 36         | 64.5% | (39.4%) | 65       | 62.3% | (38.4%) |
| 8             | 28       | 55.4% | (39.4%) | 33         | 63.9% | (42.2%) | 61       | 60.0% | (40.8%) |
| 10            | 28       | 56.4% | (39.4%) | 33         | 61.9% | (41.1%) | 61       | 59.4% | (40.1%) |
| 12            | 27       | 52.9% | (40.6%) | 33         | 62.1% | (42.6%) | 60       | 58.0% | (41.6%) |
| 14            | 27       | 59.5% | (39.1%) | 33         | 59.5% | (40.5%) | 60       | 59.5% | (39.6%) |
| 16            | 27       | 64.0% | (37.4%) | 33         | 56.4% | (40.2%) | 60       | 59.8% | (38.8%) |

FIGURE S1. Glutamate/water Spaghetti Plots by Percent Days Abstinent Between Scans (Scan 1 = “pretreatment,” Scan 2 = “posttreatment”) by Treatment Group (Gabapentin vs. Placebo). Percent Days Abstinent Between Scans were binned according to the results of Johnson-Neyman analyses, described in *Results*. Solid black horizontal lines depict the average glutamate/water levels at each scan. Within each Percent Days Abstinent bin, the statistical significance of differences in pretreatment-to-posttreatment changes in glutamate/water levels between Treatment Groups is indicated. Glu = Glutamate, I.U. = Institutional Units. \* $p < 0.05$ , *ns.* = not significant (i.e.,  $p > 0.05$ ).

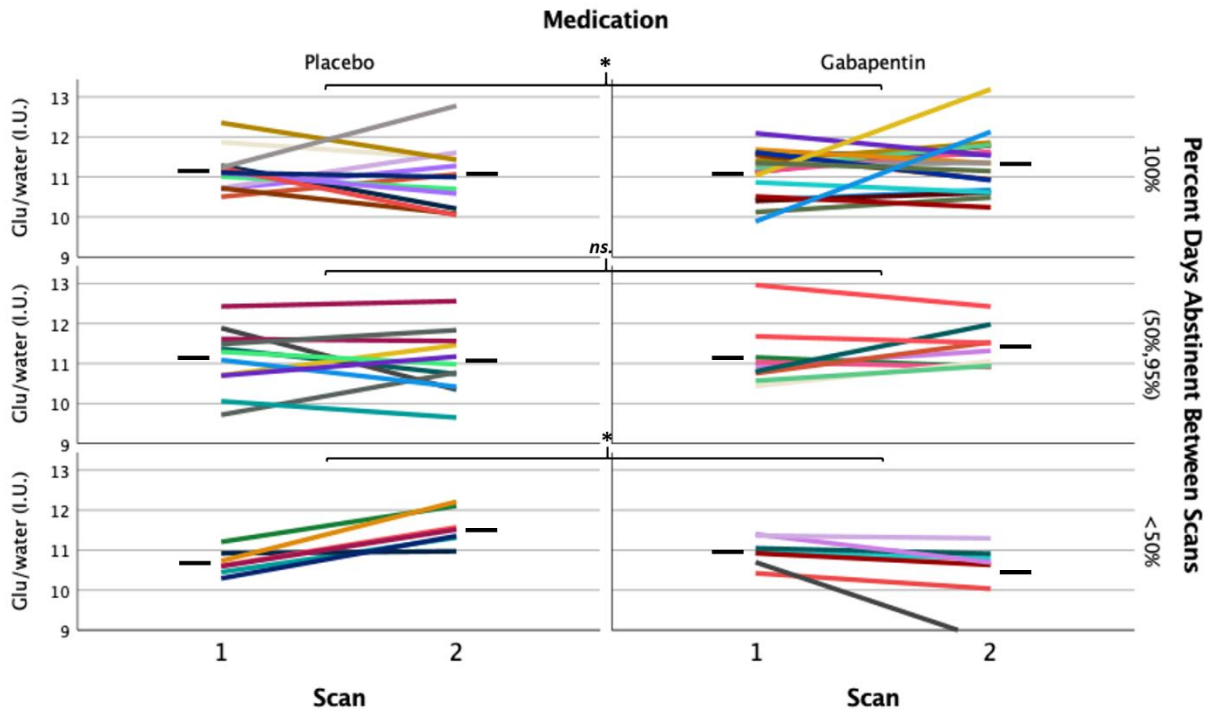

**FIGURE S2.** GABA/water spaghetti plots by Percent Days Abstinent Between Scans (Scan 1 = “pretreatment,” Scan 2 = “posttreatment”) by Treatment Group (Gabapentin vs. Placebo). Percent Days Abstinent Between Scans were binned according to the results of Johnson-Neyman analyses, described in *Results*. Solid black horizontal lines depict the average GABA/water levels at each scan. Within each Percent Days Abstinent bin, the statistical significance of differences in pretreatment-to-posttreatment changes in GABA/water levels between Treatment Groups is indicated. I.U. = Institutional Units.  
 \* $p < 0.05$ , *ns.* = not significant (i.e.,  $p > 0.05$ ).

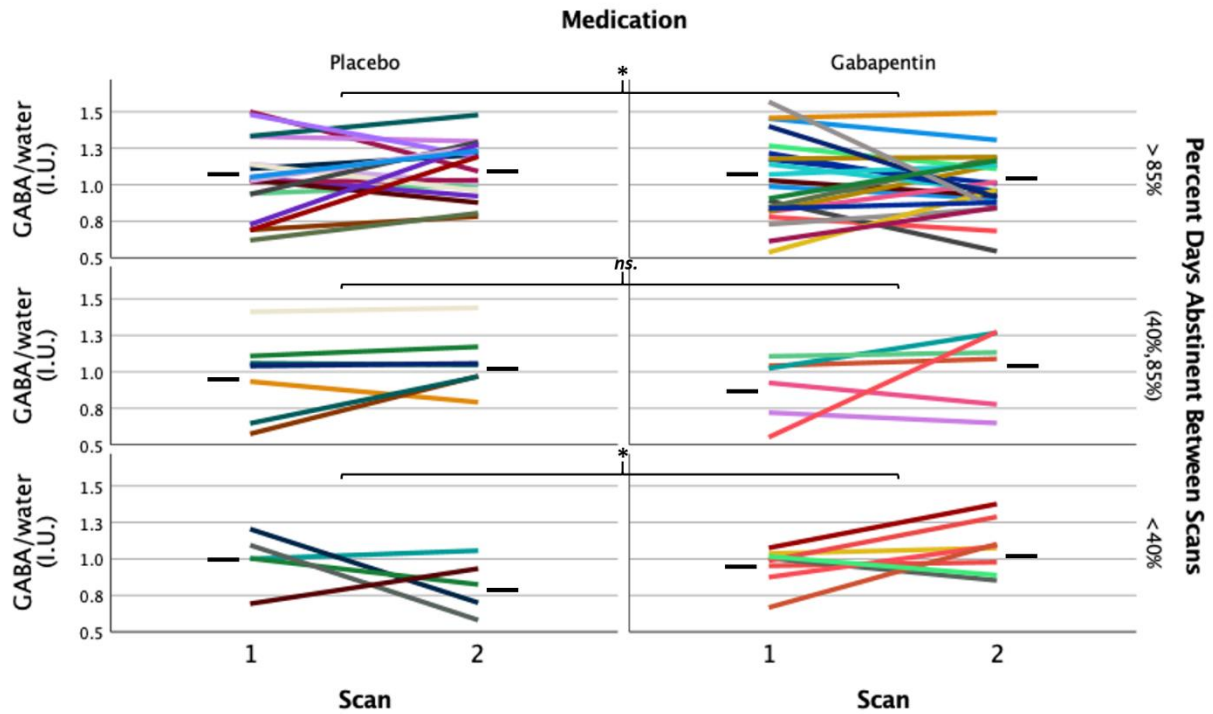

**FIGURE S3.** Percent days abstinent following scan 2 (i.e., early treatment; y-axis) by baseline dorsal anterior cingulate cortex (dACC) glutamate (n=64) levels (x-axis), normalized to water and expressed in Institutional Units (I.U.), by treatment group (red line = placebo, blue line = gabapentin). Error bands represent 95% confidence intervals.

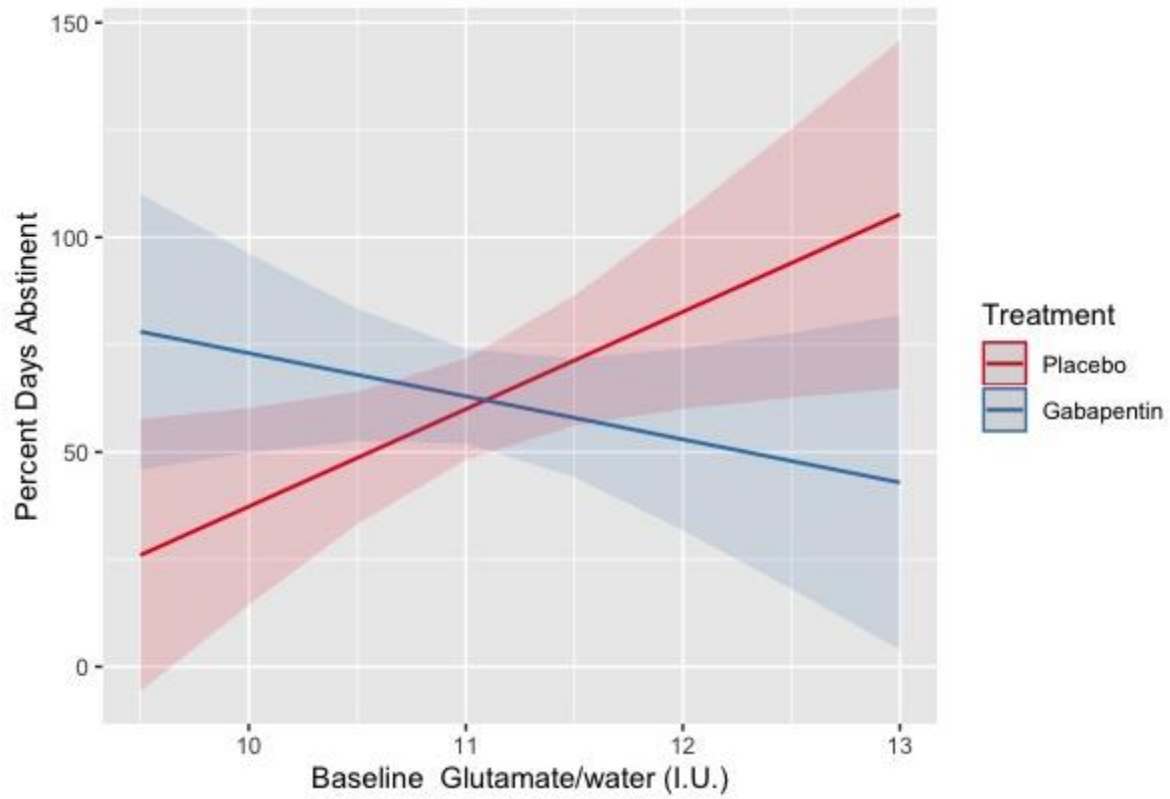

Supplement: appi.ajp.2021.20121757.ds001.pdf [file appi.ajp.2021.20121757.ds001.pdf]
